# Supplementary material
Source: PubMed Central journal article supplement (PMC5166487)

**Figure S1**

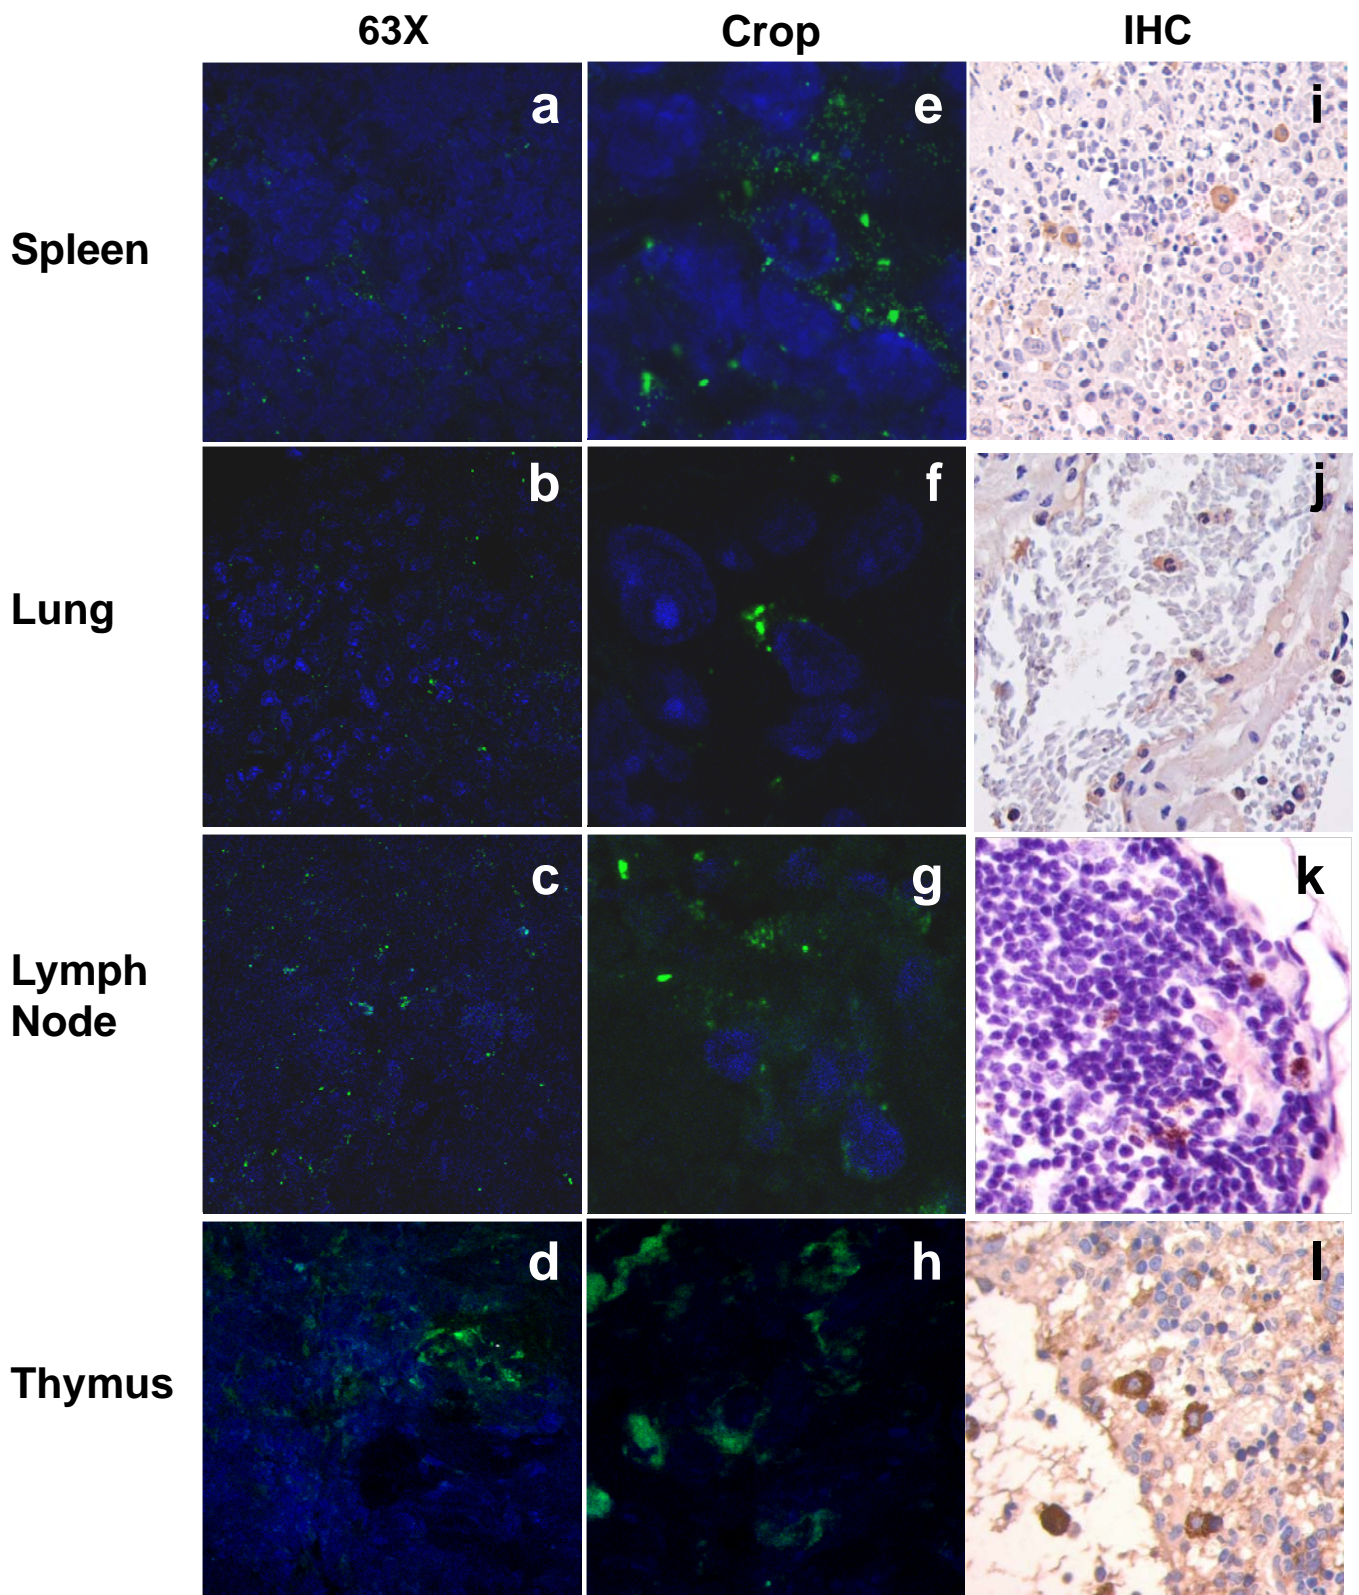

**Figure S2**

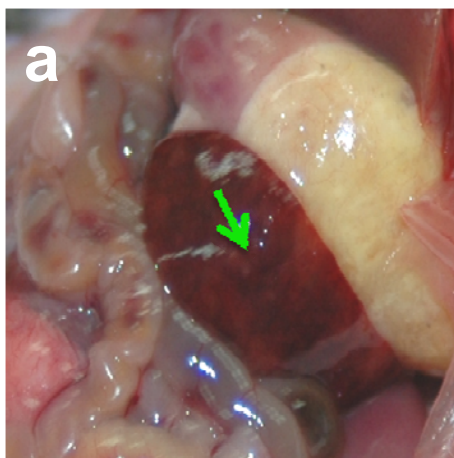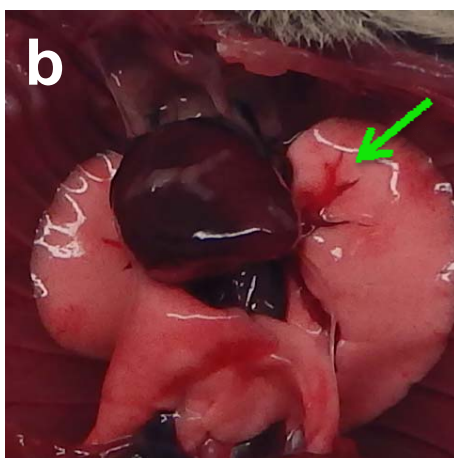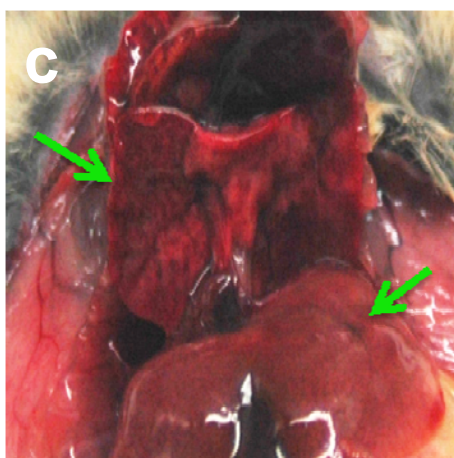

Supplement: ijbsv12p1448s1.pdf [file ijbsv12p1448s1.pdf]
